# Supplementary material for: Homoduplex to i-motif structural switch exhibited by a cytosine rich strand of the MYH7 heavy chain β gene promoter at physiological pH
Source: Royal Society of Chemistry journal article supplement (doi:10.1039/c8ra05179h), 2018-01-01
Supplement: c8ra05179h1.pdf [file c8ra05179h1.pdf]

**Homoduplex to i-motif structural switch exhibited by a Cytosine rich strand of *MYH 7* heavy chain  $\beta$  gene promoter at physiological pH**

Anju Singh and Shrikant Kukreti\*

*Nucleic Acids Research Lab, Department of Chemistry, University of Delhi, Delhi-110007, India*

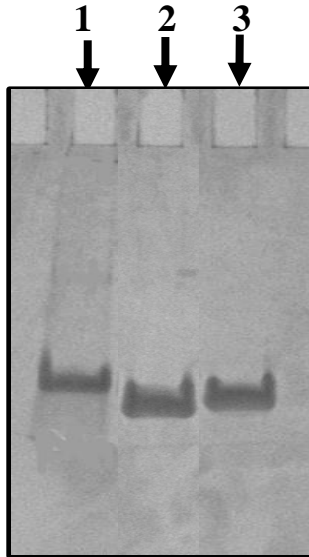

**Figure S1:** 20% denaturing PAGE mobility pattern of oligonucleotide sequences. lane 1: M35, lane 2: HM34C, lane 3: RM34C. in 1X TBE and 100% formamide.

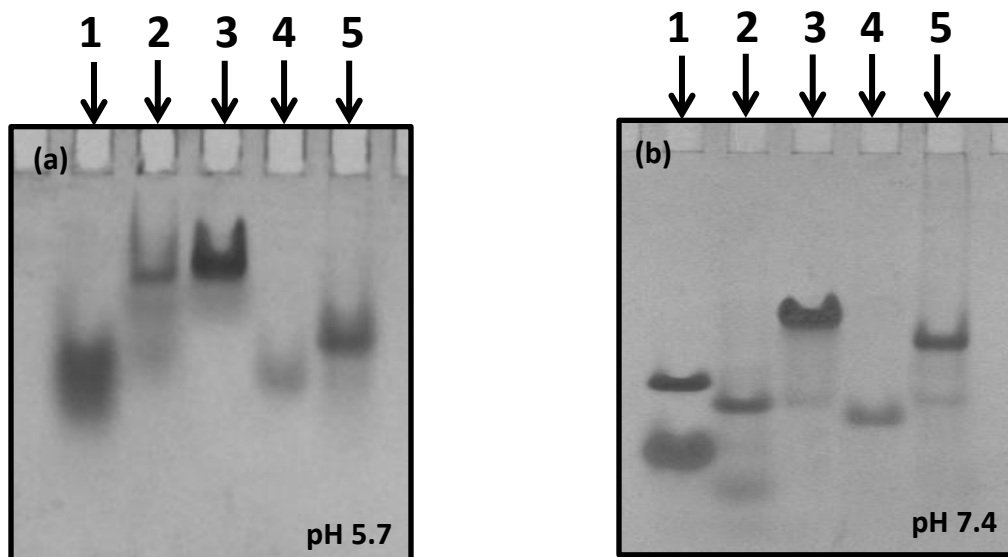

**Figure S2:** 15% Native PAGE mobility pattern of oligonucleotide sequences room temperature (37 °C) and varied pH. lane 1: PAL12+PAL24, lane 2: HM34C, lane 3: RM34C, lane 4: M35, lane 5: M35+M35C containing 0.1 M NaCl and 0.1 mM EDTA in 20 mM sodium cacodylate buffer at (a) pH 5.7 and (b) pH 7.4.

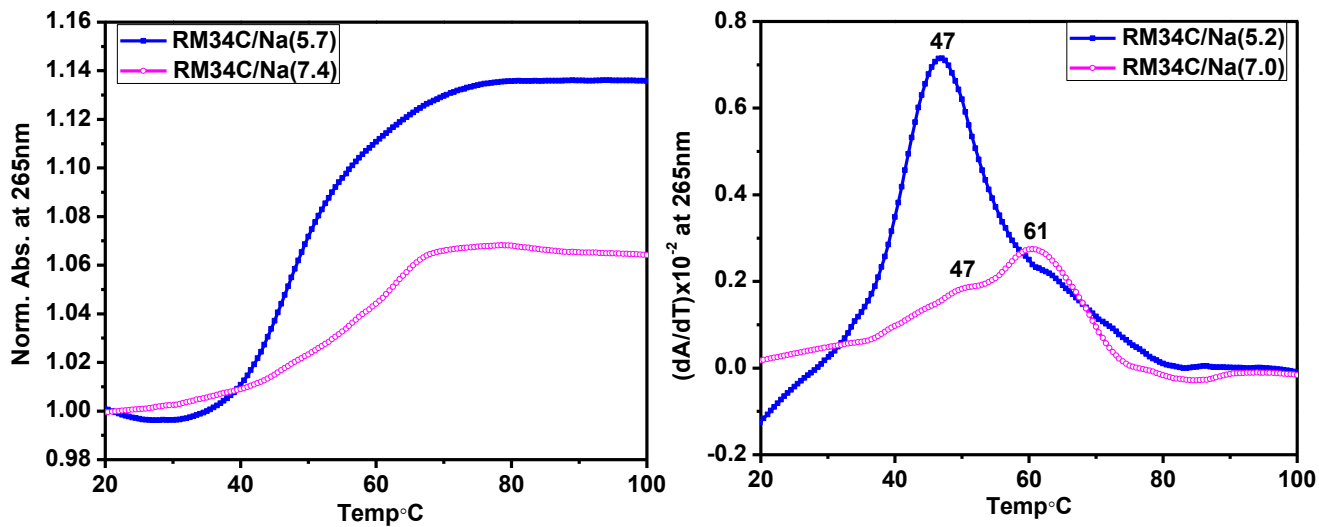

**Figure S3:** Thermal denaturation data of 3 $\mu$ M RM34C sequence at 265 nm. Samples were prepared in 20 mM sodium cacodylate buffer of pH 5.7 and 7.4 containing 100 mM NaCl and 0.1 mM EDTA respectively.
